# Supplementary material
Source: publisher figshare collection journal article supplement (https://plos.figshare.com/articles/dataset/_/6769772)
Supplement: Supplementary file 1 [file 1]

Archive with 3 entries (3 files):
- pone.0199842.s001.pdf
- pone.0199842.s002.pdf
- pone.0199842.s003.xlsx
