# Supplementary material
Source: publisher figshare collection journal article supplement (https://plos.figshare.com/articles/dataset/_/6769772)
Supplement: Supplementary file 1 [file 1 › pone.0199842.s002.pdf]

## Detailed statistical results

Significant terms are marked in red

### Non-specific gill score

#### AVERAGE Non-specific gill score

Exposure day + 1 dphe

*PERMANOVA table of results*

| Source           | df | SS      | MS      | Pseudo-F | P(perm) |
|------------------|----|---------|---------|----------|---------|
| Treatment        | 1  | 1.5313  | 1.5313  | 5.8136   | 0.0245  |
| Time             | 1  | 0.28125 | 0.28125 | 1.0678   | 0.3216  |
| Treatment x Time | 1  | 0.78125 | 0.78125 | 2.9661   | 0.098   |
| Residuals        | 28 | 7.375   | 0.26339 |          |         |
| Total            | 31 | 9.9688  |         |          |         |

3 dphe onwards

*PERMANOVA table of results*

| Source                  | df  | SS       | MS       | Pseudo-F | P(perm) | P(MC)  |
|-------------------------|-----|----------|----------|----------|---------|--------|
| Treatment               | 3   | 0.083333 | 0.027778 | 0.13333  |         | 0.9409 |
| Time                    | 5   | 1.65     | 0.33     | 1.1061   | 0.3912  |        |
| Tank (Treatment)        | 4   | 0.83333  | 0.20833  | 0.90909  | 0.4734  |        |
| Treatment x Time        | 15  | 5.3167   | 0.35444  | 1.1881   | 0.3498  |        |
| Tank (Treatment) x Time | 20  | 5.9667   | 0.29833  | 1.3018   | 0.1726  |        |
| Residuals               | 192 | 44       | 0.22917  |          |         |        |
| Total                   | 239 | 57.85    |          |          |         |        |

*Pooled terms*

Tank (Treatment) x Time

*PERMANOVA table of results*

| Source           | df  | SS       | MS       | Pseudo-F | P(perm) | P(MC)  |
|------------------|-----|----------|----------|----------|---------|--------|
| Treatment        | 3   | 0.083333 | 0.027778 | 0.13333  |         | 0.9382 |
| Time             | 5   | 1.65     | 0.33     | 1.4001   | 0.2168  |        |
| Tank (Treatment) | 4   | 0.83333  | 0.20833  | 0.88392  | 0.4814  |        |
| Treatment x Time | 15  | 5.3167   | 0.35444  | 1.5038   | 0.1068  |        |
| Pooled           | 212 | 49.967   | 0.23569  |          |         |        |
| Total            | 239 | 57.85    |          |          |         |        |

*Pooled terms*

Tank (Treatment)

Tank (Treatment) x Time

*PERMANOVA table of results*

| Source           | df  | SS       | MS       | Pseudo-F | P(perm) |
|------------------|-----|----------|----------|----------|---------|
| Treatment        | 3   | 0.083333 | 0.027778 | 0.11811  | 0.949   |
| Time             | 5   | 1.65     | 0.33     | 1.4031   | 0.2176  |
| Treatment x Time | 15  | 5.3167   | 0.35444  | 1.5071   | 0.0961  |
| Pooled           | 216 | 50.8     | 0.23519  |          |         |
| Total            | 239 | 57.85    |          |          |         |

No significant differences

**PREVALENCE for positive non-specific gill score**

*Fishers Exact Test:*

| C-group vs. H-group | p     |
|---------------------|-------|
| Exposure day        | 0.343 |
| 1 dphe              | 0.029 |

## AGD gill score

### Average AGD score

#### 3 dphe onwards

PERMANOVA table of results

| Source                         | df        | SS            | MS             | Pseudo-F      | P(perm)       | P(MC)  |
|--------------------------------|-----------|---------------|----------------|---------------|---------------|--------|
| Treatment                      | 3         | 218.02        | 72.672         | 792.79        |               | 0.0001 |
| Time                           | 5         | 97.233        | 19.447         | 60.456        | 0.0001        |        |
| Tank (Treatment)               | 4         | 0.36667       | 0.091667       | 0.47826       | 0.7633        |        |
| Treatment x Time               | 15        | 68.733        | 4.5822         | 14.245        | 0.0001        |        |
| <b>Tank (Treatment) x Time</b> | <b>20</b> | <b>6.4333</b> | <b>0.32167</b> | <b>1.6783</b> | <b>0.0398</b> |        |
| Residuals                      | 192       | 36.8          | 0.19167        |               |               |        |
| Total                          | 239       | 427.58        |                |               |               |        |

#### PAIR-WISE TESTS

Term 'Treatment x Time'

Within level '3 dphe' of factor 'time'

| Groups                             | t                | P(MC)         |
|------------------------------------|------------------|---------------|
| Control, hydroids                  | Denominator is 0 |               |
| <b>Control, P.per.</b>             | <b>6</b>         | <b>0.0001</b> |
| <b>Control, Hydroids + P.per.</b>  | <b>3</b>         | <b>0.0076</b> |
| <b>Hydroids, P.per.</b>            | <b>6</b>         | <b>0.0001</b> |
| <b>Hydroids, Hydroids + P.per.</b> | <b>3</b>         | <b>0.0079</b> |
| P.per., Hydro + P.per.             | 1.4056           | 0.1722        |

Within level '7 dphe' of factor 'time'

| Groups                            | t                | P(MC)         |
|-----------------------------------|------------------|---------------|
| Control, hydroids                 | Denominator is 0 |               |
| Control, P.per.                   | 1.964            | 0.0668        |
| <b>Control, Hydroids + P.per.</b> | <b>2.3333</b>    | <b>0.0303</b> |
| Hydroids, P.per.                  | 1.964            | 0.0672        |
| Hydroids, Hydroids + P.per.       | 2.3333           | 0.0338        |
| P.per., Hydro + P.per.            | 1.1882           | 0.2503        |

Within level '14 dphe' of factor 'time'

| Groups                      | t                | P(MC)         |
|-----------------------------|------------------|---------------|
| Control, hydroids           | Denominator is 0 |               |
| <b>Control, P.per.</b>      | <b>9</b>         | <b>0.0001</b> |
| Control, Hydroids + P.per.  | Denominator is 0 |               |
| <b>Hydroids, P.per.</b>     | <b>9</b>         | <b>0.0001</b> |
| Hydroids, Hydroids + P.per. | Denominator is 0 |               |
| P.per., Hydroids + P.per.   | 1.5              | 0.1539        |

Within level '21 dphe' of factor 'time'

| Groups                      | t      | P(MC)  |
|-----------------------------|--------|--------|
| Control, hydroids           | 1      | 0.3212 |
| Control, P.per.             | 15     | 0.0001 |
| Control, Hydroids + P.per.  | 16.5   | 0.0001 |
| Hydroids, P.per.            | 12.348 | 0.0001 |
| Hydroids, Hydroids + P.per. | 12.6   | 0.0001 |
| P.per., Hydroids + P.per.   | 1.4056 | 0.1764 |

Within level '28 dphe' of factor 'time'

| Groups                      | t      | P(MC)  |
|-----------------------------|--------|--------|
| Control, hydroids           | 1      | 0.3308 |
| Control, P.per.             | 15.922 | 0.0001 |
| Control, Hydroids + P.per.  | 11     | 0.0001 |
| Hydroids, P.per.            | 13.056 | 0.0001 |
| Hydroids, Hydroids + P.per. | 9.3915 | 0.0001 |
| P.per., Hydroids + P.per.   | 1.5492 | 0.1386 |

Within level '35 dphe' of factor 'time'

| Groups                      | t      | P(MC)  |
|-----------------------------|--------|--------|
| Control, hydroids           | 5.0138 | 0.0001 |
| Control, P.per.             | 17.335 | 0.0001 |
| Control, Hydroids + P.per.  | 18.974 | 0.0001 |
| Hydroids, P.per.            | 10.04  | 0.0001 |
| Hydroids, Hydroids + P.per. | 11.196 | 0.0001 |
| P.per., Hydroids + P.per.   | 1      | 0.3332 |

## Thrombi score

### Exposure day + 1 dphe

#### PERMANOVA table of results

| Source                  | df       | SS            | MS            | Pseudo-F      | P(perm)       |
|-------------------------|----------|---------------|---------------|---------------|---------------|
| Treatment               | 1        | 7.0313        | 7.0313        | 28.636        | 0.0001        |
| Time                    | 1        | 9.0313        | 9.0313        | 36.782        | 0.0001        |
| <b>Treatment x Time</b> | <b>1</b> | <b>7.0313</b> | <b>7.0313</b> | <b>28.636</b> | <b>0.0001</b> |
| Residuals               | 28       | 6.875         | 0.24554       |               |               |
| Total                   | 31       | 29.969        |               |               |               |

#### PAIR-WISE TESTS

Term 'Treatment x Time' for pairs of levels of factor 'Treatment'

Within level 'Exposure day' of factor 'Time'

| Groups            | t                | P(perm) |
|-------------------|------------------|---------|
| Control. hydroids | Denominator is 0 |         |

Within level '1 dphe' of factor 'Time'

| Groups                   | t             | P(MC)         |
|--------------------------|---------------|---------------|
| <b>Control. hydroids</b> | <b>5.3513</b> | <b>0.0001</b> |

### 3 dphe onwards

#### PERMANOVA table of results

| Source                         | df        | SS            | MS             | Pseudo-F     | P(perm)       | P(MC)  |
|--------------------------------|-----------|---------------|----------------|--------------|---------------|--------|
| Treatment                      | 3         | 12.713        | 4.2375         | 19.189       |               | 0,0092 |
| Time                           | 5         | 21.387        | 4.2775         | 15.794       | 0.0002        |        |
| Tank (Treatment)               | 4         | 0.88333       | 0.22083        | 0.99065      | 0.4057        |        |
| Treatment x Time               | 15        | 22.363        | 1.4908         | 5.5046       | 0.0003        |        |
| <b>Tank (Treatment) x Time</b> | <b>20</b> | <b>5.4167</b> | <b>0.27083</b> | <b>1.215</b> | <b>0.2534</b> |        |
| Residuals                      | 192       | 42.8          | 0.22292        |              |               |        |
| Total                          | 239       | 105.56        |                |              |               |        |

#### Pooled terms

Tank (Treatment) x Time

#### PERMANOVA table of results

| Source                  | df       | SS             | MS             | Pseudo-F       | P(perm)      | P(MC)  |
|-------------------------|----------|----------------|----------------|----------------|--------------|--------|
| Treatment               | 3        | 12.713         | 4.2375         | 19.189         |              | 0,0072 |
| Time                    | 5        | 21.387         | 4.2775         | 18.807         | 0.0001       |        |
| <b>Tank (Treatment)</b> | <b>4</b> | <b>0.88333</b> | <b>0.22083</b> | <b>0.97096</b> | <b>0.424</b> |        |
| Treatment x Time        | 15       | 22.363         | 1.4908         | 6.5549         | 0.0001       |        |
| Pooled                  | 212      | 48.217         | 0.22744        |                |              |        |
| Total                   | 239      | 105.56         |                |                |              |        |

*Pooled terms*

Tank (Treatment)

Tank (Treatment) x Time

*PERMANOVA table of results*

| Source                  | df        | SS            | MS            | Pseudo-F      | P(perm)       |
|-------------------------|-----------|---------------|---------------|---------------|---------------|
| Treatment               | 3         | 12.713        | 4.2375        | 18.642        | 0.0001        |
| Time                    | 5         | 21.387        | 4.2775        | 18.818        | 0.0001        |
| <b>Treatment x Time</b> | <b>15</b> | <b>22.363</b> | <b>1.4908</b> | <b>6.5585</b> | <b>0.0001</b> |
| Pooled                  | 216       | 49.1          | 0.22731       |               |               |
| Total                   | 239       | 105.56        |               |               |               |

*PAIR-WISE TESTS*

Term 'Treatment x Time' for pairs of levels of factor 'Treatment'

Within level '3 dphe' of factor 'Time'

| Groups                           | t             | P(MC)         |
|----------------------------------|---------------|---------------|
| <b>Control, Hydroids</b>         | <b>6.862</b>  | <b>0.0001</b> |
| Control, P.per                   | 1.5           | 0.1493        |
| <b>Control, Hydroids + P.per</b> | <b>5.5816</b> | <b>0.0001</b> |
| <b>Hydroids, P.per</b>           | <b>5.5317</b> | <b>0.0001</b> |
| Hydroids, Hydroids + P.per       | 1.0366        | 0.3094        |
| <b>P.Per, Hydroids + P.per</b>   | <b>4.3333</b> | <b>0.0004</b> |

Within level '7 dphe' of factor 'Time'

| Groups                           | t             | P(MC)         |
|----------------------------------|---------------|---------------|
| <b>Control, Hydroids</b>         | <b>2.2778</b> | <b>0.0365</b> |
| Control, P.per                   | Negative      |               |
| <b>Control, Hydroids + P.per</b> | <b>3.8571</b> | <b>0.0011</b> |
| <b>Hydroids, P.per</b>           | <b>2.2778</b> | <b>0.0334</b> |
| Hydroids, Hydroids + P.per       | 0.55709       | 0.5883        |
| <b>P.Per, Hydroids + P.per</b>   | <b>3.8571</b> | <b>0.0011</b> |

Within level '14 dphe' of factor 'Time'

| Groups                     | t                | P(MC)  |
|----------------------------|------------------|--------|
| Control, Hydroids          | Denominator is 0 |        |
| Control, P.per             | 1                | 0.3358 |
| Control, Hydroids + P.per  | 1.4056           | 0.1802 |
| Hydroids, P.per            | 1                | 0.328  |
| Hydroids, Hydroids + P.per | 1.4056           | 0.1766 |
| P.Per, Hydroids + P.per    | 0.84853          | 0.4053 |

Within level '21 dphe' of factor 'Time'

| Groups                     | t        | P(MC)  |
|----------------------------|----------|--------|
| Control, Hydroids          | Negative |        |
| Control, P.per             | 1        | 0.3272 |
| Control, Hydroids + P.per  | 1.2362   | 0.2297 |
| Hydroids, P.per            | 1        | 0.3375 |
| Hydroids, Hydroids + P.per | 1.2362   | 0.2338 |
| P.Per, Hydroids + P.per    | 1.8091   | 0.089  |

Within level '28 dphe' of factor 'Time'

| Groups                     | t        | P(MC)  |
|----------------------------|----------|--------|
| Control, Hydroids          | 0.84853  | 0.3997 |
| Control, P.per             | Negative |        |
| Control, Hydroids + P.per  | 1.44E-08 | 1      |
| Hydroids, P.per            | 0.84853  | 0.3991 |
| Hydroids, Hydroids + P.per | 0.84853  | 0.4084 |
| P.Per, Hydroids + P.per    | Negative |        |

Within level '35 dphe' of factor 'Time'

| Groups                     | t        | P(MC)  |
|----------------------------|----------|--------|
| Control, Hydroids          | 1        | 0.3215 |
| Control, P.per             | Negative |        |
| Control, Hydroids + P.per  | Negative |        |
| Hydroids, P.per            | 1        | 0.3387 |
| Hydroids, Hydroids + P.per | 1        | 0.3295 |
| P.Per, Hydroids + P.per    | Negative |        |

### **PREVALENCE for positive Thrombi score**

*Fishers Exact Test:*

| C-group vs. H-group | p           |
|---------------------|-------------|
| Exposure day        | 0.342       |
| <b>1 dphe</b>       | <b>0.01</b> |

## Hyperplasia score

### AVERAGE Hyperplasia score

#### Exposure day + 1 dphe

##### PERMANOVA table of results

| Source           | df | SS      | MS      | Pseudo-F | P(perm) |
|------------------|----|---------|---------|----------|---------|
| Treatment        | 1  | 1.5313  | 1.5313  | 3.0901   | 0.0946  |
| Time             | 1  | 0.03125 | 0.03125 | 0.063063 | 0.8315  |
| Treatment x Time | 1  | 1.5313  | 1.5313  | 3.0901   | 0.0906  |
| Residuals        | 28 | 13.875  | 0.49554 |          |         |
| Total            | 31 | 16.969  |         |          |         |

No significant differences

#### 3 dphe onwards

##### PERMANOVA table of results

| Source                  | df  | SS      | MS       | Pseudo-F | P(perm) | P(MC)  |
|-------------------------|-----|---------|----------|----------|---------|--------|
| Treatment               | 3   | 14.733  | 4.9111   | 147.33   |         | 0,0002 |
| Time                    | 5   | 24.583  | 4.9167   | 8.1492   | 0.0006  |        |
| Tank (Treatment)        | 4   | 0.13333 | 0.033333 | 0.048193 | 0.9961  |        |
| Treatment x Time        | 15  | 29.617  | 1.9744   | 3.2726   | 0.0089  |        |
| Tank (Treatment) x Time | 20  | 12.067  | 0.60333  | 0.87229  | 0.6216  |        |
| Residuals               | 192 | 132.8   | 0.69167  |          |         |        |
| Total                   | 239 | 213.93  |          |          |         |        |

##### Pooled terms

Tank (Treatment) x Time

##### PERMANOVA table of results

| Source           | df  | SS      | MS       | Pseudo-F | P(perm) | P(MC)  |
|------------------|-----|---------|----------|----------|---------|--------|
| Treatment        | 3   | 14.733  | 4.9111   | 147.33   |         | 0,0002 |
| Time             | 5   | 24.583  | 4.9167   | 7.1951   | 0.0001  |        |
| Tank (Treatment) | 4   | 0.13333 | 0.033333 | 0.04878  | 0.995   |        |
| Treatment x Time | 15  | 29.617  | 1.9744   | 2.8894   | 0.0006  |        |
| Residuals        | 212 | 144.87  | 0.68333  |          |         |        |
| Total            | 239 | 213.93  |          |          |         |        |

##### Pooled terms

Tank (Treatment)

Tank (Treatment) x Time

##### PERMANOVA table of results

| Source           | df  | SS     | MS     | Pseudo-F | P(perm) |
|------------------|-----|--------|--------|----------|---------|
| Treatment        | 3   | 14.733 | 4.9111 | 7.3159   | 0.0002  |
| Time             | 5   | 24.583 | 4.9167 | 7.3241   | 0.0001  |
| Treatment x Time | 15  | 29.617 | 1.9744 | 2.9412   | 0.0004  |
| Pooled           | 216 | 145    | 0.6713 |          |         |
| Total            | 239 | 213.93 |        |          |         |

## PAIR-WISE TESTS

Term 'Treatment x Time' for pairs of levels of factor

Within level '3 dphe' of factor 'Time'

| Groups                     | t        | P(MC)  |
|----------------------------|----------|--------|
| Control, Hydroids          | 0.67082  | 0.523  |
| Control, P.per             | 3.82E-08 | 1      |
| Control, Hydroids + P.per  | 1.3416   | 0.1978 |
| Hydroids, P.per            | 0.47434  | 0.6312 |
| Hydroids, Hydroids + P.per | 0.6396   | 0.5316 |
| P.Per, Hydroids + P.per    | 0.94868  | 0.3548 |

Within level '7 dphe' of factor 'Time'

| Groups                     | t        | P(MC)  |
|----------------------------|----------|--------|
| Control, Hydroids          | 0.25631  | 0.8027 |
| Control, P.per             | 1.47E-08 | 1      |
| Control, Hydroids + P.per  | 0.70065  | 0.489  |
| Hydroids, P.per            | 0.3046   | 0.7621 |
| Hydroids, Hydroids + P.per | 1.1442   | 0.2634 |
| P.Per, Hydroids + P.per    | 0.80498  | 0.4275 |

Within level '14 dphe' of factor 'Time'

| Groups                     | t        | P(MC)  |
|----------------------------|----------|--------|
| Control, Hydroids          | 0.46291  | 0.6541 |
| Control, P.per             | 0.43759  | 0.6688 |
| Control, Hydroids + P.per  | 1.5213   | 0.1473 |
| Hydroids, P.per            | 1.78E-08 | 1      |
| Hydroids, Hydroids + P.per | 2.4      | 0.0262 |
| P.Per, Hydroids + P.per    | 2.1909   | 0.0365 |

Within level '21 dphe' of factor 'Time'

| Groups                     | t       | P(MC)  |
|----------------------------|---------|--------|
| Control, Hydroids          | 0.91499 | 0.3726 |
| Control, P.per             | 1.6348  | 0.1214 |
| Control, Hydroids + P.per  | 0.3873  | 0.7035 |
| Hydroids, P.per            | 4.0931  | 0.0009 |
| Hydroids, Hydroids + P.per | 1.5213  | 0.1438 |
| P.Per, Hydroids + P.per    | 1.3007  | 0.2061 |

Within level '28 dphe' of factor 'Time'

| Groups                     | t        | P(MC)  |
|----------------------------|----------|--------|
| Control, Hydroids          | 1.89E-08 | 1      |
| Control, P.per             | 2.4495   | 0.0247 |
| Control, Hydroids + P.per  | 2.3333   | 0.0319 |
| Hydroids, P.per            | 2.2283   | 0.0411 |
| Hydroids, Hydroids + P.per | 2.0896   | 0.0507 |
| P.Per, Hydroids + P.per    | 0.39736  | 0.6942 |

Within level '35 dphe' of factor 'Time'

| Groups                     | t       | P(MC)  |
|----------------------------|---------|--------|
| Control, Hydroids          | 0.84665 | 0.4079 |
| Control, P.per             | 6.3258  | 0.0001 |
| Control, Hydroids + P.per  | 6.5485  | 0.0001 |
| Hydroids, P.per            | 4.4272  | 0.0006 |
| Hydroids, Hydroids + P.per | 4.6663  | 0.0002 |
| P.Per, Hydroids + P.per    | 0.44721 | 0.6585 |

### **PREVALENCE for positive Hyperplasia score**

*Fishers Exact Test:*

| C-group vs. H-group | p     |
|---------------------|-------|
| Exposure day        | 0.342 |
| 1 dphe              | 0.01  |

## AGD lesion score

### AVERAGE AGD lesion score

#### 3 dphe onwards

PERMANOVA table of results

| Source                  | df  | SS     | MS       | Pseudo-F | P(perm) | P(MC)  |
|-------------------------|-----|--------|----------|----------|---------|--------|
| Treatment               | 3   | 27.546 | 9.1819   | 48.97    |         | 0.0013 |
| Time                    | 5   | 39.237 | 7.8475   | 101.26   | 0.0001  |        |
| Tank (Treatment)        | 4   | 0.75   | 0.1875   | 1.9565   | 0.101   |        |
| Treatment x Time        | 15  | 40.179 | 2.6786   | 34.563   | 0.0001  |        |
| Tank (Treatment) x Time | 20  | 1.55   | 0.0775   | 0.8087   | 0.709   |        |
| Residuals               | 192 | 18.4   | 0.095833 |          |         |        |
| Total                   | 239 | 127.66 |          |          |         |        |

Pooled terms

Tank (Treatment) x Time

PERMANOVA table of results

| Source           | df  | SS     | MS       | Pseudo-F | P(perm) | P(MC) |
|------------------|-----|--------|----------|----------|---------|-------|
| Treatment        | 3   | 27.546 | 9.1819   | 48.97    |         | 0.002 |
| Time             | 5   | 39.237 | 7.8475   | 83.392   | 0.0001  |       |
| Tank (Treatment) | 4   | 0.75   | 0.1875   | 1.9925   | 0.0979  |       |
| Treatment x Time | 15  | 40.179 | 2.6786   | 28.464   | 0.0001  |       |
| Residuals        | 212 | 19.95  | 0.094104 |          |         |       |
| Total            | 239 | 127.66 |          |          |         |       |

#### PAIR-WISE TESTS

Term 'Treatment x Time' for pairs of levels of factor 'Treatment'

Too little data available for 3, 7 and 14 dphe. Treatment groups "Control" and "Hydroids" had only 0 values

Within level '21 dphe' of factor 'Time'

| Groups                     | t                | P(perm) | P(MC)  |
|----------------------------|------------------|---------|--------|
| Control, Hydroids          | Denominator is 0 |         |        |
| Control, P.per             | 5                | 0,3368  | 0,0394 |
| Control, Hydroids + P.per  | 1                | 1       | 0,427  |
| Hydroids, P.per            | 5                | 0,3386  | 0,0379 |
| Hydroids, Hydroids + P.per | 1                | 1       | 0,4192 |
| P.Per, Hydroids + P.per    | 1,3416           | 0,6626  | 0,3141 |

Within level '28 dphe' of factor 'Time'

| Groups                     | t                | P(perm) | P(MC)  |
|----------------------------|------------------|---------|--------|
| Control, Hydroids          | Denominator is 0 |         |        |
| Control, P.per             | Denominator is 0 |         |        |
| Control, Hydroids + P.per  | 4,3333           | 0,3234  | 0,0553 |
| Hydroids, P.per            | Denominator is 0 |         |        |
| Hydroids, Hydroids + P.per | 4,3333           | 0,3358  | 0,0502 |
| P.Per, Hydroids + P.per    | 1                | 1       | 0,4308 |

Within level '35 dphe' of factor 'Time'

| Groups                     | t                | P(perm) | P(MC)  |
|----------------------------|------------------|---------|--------|
| Control, Hydroids          | Denominator is 0 |         |        |
| Control, P.per             | Denominator is 0 |         |        |
| Control, Hydroids + P.per  | 11               | 0,3277  | 0,0092 |
| Hydroids, P.per            | Denominator is 0 |         |        |
| Hydroids, Hydroids + P.per | 11               | 0,3245  | 0,0076 |
| P.Per, Hydroids + P.per    | 1                | 1       | 0,4276 |

### **PREVALENCE for positive AGD lesion score**

*Fishers Exact Test\*:*

| PP- vs. H+PP group | p     |
|--------------------|-------|
| 21 dphe            | 0.626 |
| 28 dphe            | 0.1   |

\*Conducted for days with sufficient data
