# Supplementary material
Source: publisher figshare collection journal article supplement (https://plos.figshare.com/articles/dataset/_/6769772)
Supplement: Supplementary file 1 [file 1 › pone.0199842.s003.xlsx]

## Sheet: Supplement data
Data for 'Effects of cnidarian biofouling on salmon gill health and development of Amoebic gill disease'
						Macroscopic analysis		Histologi				qPCR
Individual ID	Treatment	Tank	Sampling time (days past hydroid exposure)	Length (cm)	Weight (g)	Non-specific gill score	AGD gill score	Thrombi score	Hyperplasia score	AGD lesion score	Presence of amoeba (Y/N)	P. perurans	B. cysticola	D. lepeophtherii	SGPV
L1	Naive	1	-1 dphe	21.3	101.8	1	0	0	1	0	0	No Ct	23.33	neg	neg
L2	Naive	1	-1 dphe	23	116.7	1	0	0	2	0	0	No Ct	24.85	neg	neg
L3	Naive	2	-1 dphe	20.1	81.3	0	0	0	1	0	0	No Ct	25.46	neg	neg
L4	Naive	2	-1 dphe	21.1	98.6	1	0	0	1	0	0	No Ct	24.72	neg	neg
L5	Naive	3	-1 dphe	22.3	109.5	0	0	0	2	0	0	No Ct	25.06	neg	neg
L6	Naive	3	-1 dphe	20.8	93.7	0	0	0	1	0	0	No Ct	23.61	neg	neg
L7	Naive	4	-1 dphe	22.2	105.7	0	0	0	0	0	0	No Ct	25.53	neg	neg
L8	Naive	4	-1 dphe	23.4	121.4	0	0	0	1	0	0	No Ct	24.01	neg	neg
L9	Naive	5	-1 dphe	22.3	111.8	0	0	0	2	0	0	No Ct	23.55	neg	neg
L10	Naive	5	-1 dphe	21.5	99.1	1	0	0	2	0	0	No Ct	22.36	neg	neg
L11	Naive	6	-1 dphe	22.2	118.4	0	0	0	2	0	0	No Ct	24.35	neg	neg
L12	Naive	6	-1 dphe	19.8	74.7	0	0	0	1	0	0	No Ct	27.56	neg	neg
L13	Naive	7	-1 dphe	21.2	84.8	0	0	0	1	0	0	No Ct	22.07	neg	neg
L14	Naive	7	-1 dphe	21.8	84.9	1	0	0	3	0	0	No Ct	23.29	neg	neg
L15	Naive	8	-1 dphe	21.2	93.6	1	0	0	2	0	0	No Ct	22.67	neg	neg
L16	Naive	8	-1 dphe	24.2	140	0	0	0	0	0	0	No Ct	23.59	neg	neg
L17	Control	4	0 dphe	24.8	147.8	0	0	0	0	0	0	No Ct
L18	Control	4	0 dphe	21.7	97.4	0	0	0	1	0	0	No Ct
L19	Control	8	0 dphe	22.7	108.3	1	0	0	1	0	0	No Ct
L20	Control	8	0 dphe	22	101.8	0	0	0	0	0	0	No Ct
L21	P.perurans	2	0 dphe	23.1	114.7	1	0	0	2	0	0	No Ct
L22	P.perurans	2	0 dphe	22.9	116.3	1	0	0	2	0	0	No Ct
L23	P.perurans	7	0 dphe	22.5	123.9	0	0	0	1	0	0	No Ct
L24	P.perurans	7	0 dphe	23.4	144.7	0	0	0	1	0	0	No Ct
L25	Hydroids	1	0 dphe	22.2	104.2	0	0	0	1	0	0	No Ct
L26	Hydroids	1	0 dphe	22.9	109.1	1	0	0	2	0	0	No Ct
L27	Hydroids	5	0 dphe	22	108	0	0	0	1	0	0	No Ct
L28	Hydroids	5	0 dphe	21.7	105.2	0	0	0	0	0	0	No Ct
L29	Hydroids + P.perurans	3	0 dphe	24	139.4	1	0	0	1	0	0	No Ct
L30	Hydroids + P.perurans	3	0 dphe	20.1	82.8	1	0	0	2	0	0	No Ct
L31	Hydroids + P.perurans	6	0 dphe	21.3	105.4	0	0	0	0	0	0	No Ct
L32	Hydroids + P.perurans	6	0 dphe	24.2	137.5	1	0	0	1	0	0	No Ct
L33	Control	4	1 dphe	23.4	103.4	1	0	0	0	0	0	No Ct
L34	Control	4	1 dphe	21.1	98	0	0	0	0	0	0	No Ct
L35	Control	8	1 dphe	19.7	74.7	0	0	0	0	0	0	No Ct
L36	Control	8	1 dphe	19.6	75.4	0	0	0	1	0	0	No Ct
L37	P.perurans	2	1 dphe	21.3	90.3	1	0	0	0	0	0	No Ct
L38	P.perurans	2	1 dphe	21.9	101.8	0	0	1	1	0	0	No Ct
L39	P.perurans	7	1 dphe	23	119	0	0	0	2	0	0	No Ct
L40	P.perurans	7	1 dphe	23.4	121.3	0	0	0	0	0	0	No Ct
L41	Hydroids	1	1 dphe	20.3	81.7	1	0	2	1	0	0	No Ct
L42	Hydroids	1	1 dphe	23.5	130.3	1	0	2	2	0	0	No Ct
L43	Hydroids	5	1 dphe	21.6	95.9	2	0	3	2	0	0	No Ct
L44	Hydroids	5	1 dphe	20.4	84	1	0	2	1	0	0	No Ct
L45	Hydroids + P.perurans	3	1 dphe	21.9	101.6	1	0	2	2	0	0	No Ct
L46	Hydroids + P.perurans	3	1 dphe	20.9	96.4	1	0	0	1	0	0	No Ct
L47	Hydroids + P.perurans	6	1 dphe	22.1	111.6	1	0	3	1	0	0	No Ct
L48	Hydroids + P.perurans	6	1 dphe	21	89.2	0	0	2	1	0	0	No Ct
L49	Control	4	3 dphe	21.3	92.6	0	0	0	0	0	0	No Ct
L50	Control	4	3 dphe	20.5	86.5	1	0	0	1	0	0	No Ct
L51	Control	4	3 dphe	20.8	87.1	0	0	0	1	0	0	No Ct
L52	Control	4	3 dphe	23.8	144.8	0	0	0	0	0	0	No Ct
L53	Control	4	3 dphe	22.1	111.1	1	0	0	1	0	0	No Ct
L54	Control	8	3 dphe	19.8	71.7	0	0	0	1	0	0	No Ct
L55	Control	8	3 dphe	24.8	139.1	1	0	0	2	0	0	No Ct
L56	Control	8	3 dphe	21.8	100.9	1	0	0	1	0	0	No Ct
L57	Control	8	3 dphe	20	86.6	1	0	0	1	0	0	No Ct
L58	Control	8	3 dphe	23.5	146.5	0	0	0	0	0	0	No Ct
L59	Hydroids	1	3 dphe	22.8	120.5	1	0	2	0	0	0	No Ct
L60	Hydroids	1	3 dphe	20.1	102.4	0	0	3	1	0	0	No Ct
L61	Hydroids	1	3 dphe	21	81.9	1	0	1	0	0	0	No Ct
L62	Hydroids	1	3 dphe	20.8	82.4	1	0	3	1	0	0	No Ct
L63	Hydroids	1	3 dphe	19.5	69.1	0	0	2	1	0	0	No Ct
L64	Hydroids	5	3 dphe	21.2	90.9	1	0	2	0	0	0	No Ct
L65	Hydroids	5	3 dphe	20.4	92.6	2	0	2	2	0	0	No Ct
L66	Hydroids	5	3 dphe	22	104.2	0	0	2	0	0	0	No Ct
L67	Hydroids	5	3 dphe	22	112.3	0	0	2	1	0	0	No Ct
L68	Hydroids	5	3 dphe	23.3	126.8	0	0	0	0	0	0	No Ct
L69	P.perurans	2	3 dphe	22.5	129.1	0	1	1	2	0	0	39.55
L70	P.perurans	2	3 dphe	22.9	135.3	0	1	0	2	0	0	No Ct
L71	P.perurans	2	3 dphe	21.5	102	1	1	0	0	0	0	No Ct
L72	P.perurans	2	3 dphe	21	88.5	0	0	0	0	0	0	No Ct
L73	P.perurans	2	3 dphe	25.8	166.3	0	1	0	0	0	0	No Ct
L74	P.perurans	7	3 dphe	22.7	124.3	0	1	0	3	0	0	No Ct
L75	P.perurans	7	3 dphe	19.8	71.8	0	0	0	1	0	0	No Ct
L76	P.perurans	7	3 dphe	19.8	80.3	0	1	0	0	0	0	No Ct
L77	P.perurans	7	3 dphe	22.8	99.9	0	1	1	0	0	0	No Ct
L78	P.perurans	7	3 dphe	22.5	103.6	0	1	0	0	0	0	No Ct
L79	Hydroids + P.perurans	3	3 dphe	19.9	73.3	0	1	2	0	0	0	No Ct
L80	Hydroids + P.perurans	3	3 dphe	21.8	107.5	0	1	2	0	0	0	No Ct
L81	Hydroids + P.perurans	3	3 dphe	23.6	132.9	0	0	2	0	0	0	No Ct
L82	Hydroids + P.perurans	3	3 dphe	24.4	146.8	0	1	2	0	0	0	No Ct
L83	Hydroids + P.perurans	3	3 dphe	20.6	88.1	0	1	2	1	0	0	No Ct
L84	Hydroids + P.perurans	6	3 dphe	22.5	120.4	0	0	2	1	0	0	No Ct
L85	Hydroids + P.perurans	6	3 dphe	21.5	93.7	0	0	0	0	0	0	No Ct
L86	Hydroids + P.perurans	6	3 dphe	22.1	114.1	0	0	1	2	0	0	35.88
L87	Hydroids + P.perurans	6	3 dphe	20	76.7	1	0	2	0	0	0	No Ct
L88	Hydroids + P.perurans	6	3 dphe	22.6	110.2	0	1	0	0	0	0	No Ct
L89	Control	4	7 dphe	22.3	110.2	0	0	0	1	0	0	No Ct
L90	Control	4	7 dphe	20.8	89.7	0	0	0	3	0	0	No Ct
L91	Control	4	7 dphe	22	100.5	0	0	0	0	0	0	No Ct
L92	Control	4	7 dphe	20.4	105	0	0	1	0	0	0	No Ct
L93	Control	4	7 dphe	24.3	142.1	0	0	0	0	0	0	No Ct
L94	Control	8	7 dphe	22.1	115	0	0	0	0	0	0	No Ct
L95	Control	8	7 dphe	21.6	101.4	1	0	0	2	0	0	No Ct
L96	Control	8	7 dphe	26.1	135.9	0	0	0	1	0	0	No Ct
L97	Control	8	7 dphe	23.6	133	0	0	0	0	0	0	No Ct
L98	Control	8	7 dphe	18.6	61.1	1	0	0	1	0	0	No Ct
L99	Hydroids	1	7 dphe	20.4	77.7	0	0	1	1	0	0	No Ct
L100	Hydroids	1	7 dphe	26.5	195.6	0	0	0	1	0	0	No Ct
L101	Hydroids	1	7 dphe	19.7	71.6	1	0	0	1	0	0	No Ct
L102	Hydroids	1	7 dphe	23.5	129.1	0	0	0	0	0	0	No Ct
L103	Hydroids	1	7 dphe	22.2	119.6	0	0	2	0	0	0	No Ct
L104	Hydroids	5	7 dphe	23.5	135.6	0	0	2	2	0	0	No Ct
L105	Hydroids	5	7 dphe	21.5	97.7	0	0	0	1	0	0	No Ct
L106	Hydroids	5	7 dphe	21.8	112.1	0	0	1	0	0	0	No Ct
L107	Hydroids	5	7 dphe	21.6	99.2	0	0	2	0	0	0	No Ct
L108	Hydroids	5	7 dphe	23.2	122.6	0	0	0	1	0	0	No Ct
L109	P.perurans	2	7 dphe	20.8	106.6	1	0	0	0	0	0	No Ct
L110	P.perurans	2	7 dphe	21.3	98.5	1	0	0	2	0	0	No Ct
L111	P.perurans	2	7 dphe	23.4	132.7	1	1	1	2	0	0	No Ct
L112	P.perurans	2	7 dphe	25.2	159.4	1	0	0	0	0	0	35.22
L113	P.perurans	2	7 dphe	25.5	140.3	0	0	0	0	0	0	No Ct
L114	P.perurans	7	7 dphe	21.3	104.5	0	1	0	1	0	0	No Ct
L115	P.perurans	7	7 dphe	23.2	114.9	1	0	0	0	0	0	No Ct
L116	P.perurans	7	7 dphe	19.8	81	0	0	0	1	0	0	no value
L117	P.perurans	7	7 dphe	22.5	118.2	0	1	0	1	0	0	No Ct
L118	P.perurans	7	7 dphe	19.2	76.8	0	0	0	1	0	0	No Ct
L119	Hydroids + P.perurans	3	7 dphe	20.1	82.9	0	0	1	1	0	0	33.26
L120	Hydroids + P.perurans	3	7 dphe	20.9	96.8	0	0	1	0	0	0	No Ct
L121	Hydroids + P.perurans	3	7 dphe	25.9	181.6	1	0	1	2	0	0	No Ct
L122	Hydroids + P.perurans	3	7 dphe	20.2	78.2	1	1	0	2	0	0	37.67
L123	Hydroids + P.perurans	3	7 dphe	20.9	87.7	0	0	2	2	0	0	No Ct
L124	Hydroids + P.perurans	6	7 dphe	18.4	67	0	0	1	0	0	0	No Ct
L125	Hydroids + P.perurans	6	7 dphe	22.3	120.4	0	1	2	1	0	0	35.73
L126	Hydroids + P.perurans	6	7 dphe	21.4	99.5	0	1	1	1	0	0	38.59
L127	Hydroids + P.perurans	6	7 dphe	20.3	76.5	0	3	0	2	0	0	No Ct
L128	Hydroids + P.perurans	6	7 dphe	21.7	98.2	0	1	1	0	0	0	No Ct
L129	Control	4	14 dphe	27.8	199.3	1	0	0	2	0	0	No Ct
L130	Control	4	14 dphe	23.3	141.7	0	0	0	1	0	0	No Ct
L131	Control	4	14 dphe	21.7	100.4	1	0	0	2	0	0	No Ct
L132	Control	4	14 dphe	20.5	80.6	0	0	0	0	0	0	No Ct
L133	Control	4	14 dphe	22.6	127.4	0	0	0	0	0	0	No Ct
L134	Control	8	14 dphe	20	88	0	0	0	0	0	0	No Ct
L135	Control	8	14 dphe	19.4	69.9	0	0	0	3	0	0	No Ct
L136	Control	8	14 dphe	25.5	186.2	1	0	0	2	0	0	No Ct
L137	Control	8	14 dphe	23.1	111.3	0	0	0	2	0	0	No Ct
L138	Control	8	14 dphe	23.1	141.1	0	0	0	2	0	0	No Ct
L139	Hydroids	1	14 dphe	21.2	97.5	0	0	0	1	0	0	No Ct
L140	Hydroids	1	14 dphe	21.2	75.6	0	0	0	1	0	0	No Ct
L141	Hydroids	1	14 dphe	25.8	183.3	0	0	0	1	0	0	No Ct
L142	Hydroids	1	14 dphe	21.8	96.2	0	0	0	2	0	0	No Ct
L143	Hydroids	1	14 dphe	20.7	82.3	1	0	0	3	0	0	No Ct
L144	Hydroids	5	14 dphe	20.1	91.6	0	0	0	1	0	0	No Ct
L145	Hydroids	5	14 dphe	19.6	74.2	0	0	0	2	0	0	No Ct
L146	Hydroids	5	14 dphe	21.5	98.1	1	0	0	3	0	0	No Ct
L147	Hydroids	5	14 dphe	21.9	114	0	0	0	1	0	0	No Ct
L148	Hydroids	5	14 dphe	23.2	138.1	0	0	0	1	0	0	No Ct
L149	P.perurans	2	14 dphe	25.4	172	0	1	0	2	0	0	No Ct
L150	P.perurans	2	14 dphe	21.9	113.9	0	2	0	1	0	0	31.94
L151	P.perurans	2	14 dphe	21	87.7	0	2	0	3	0	0	36.02
L152	P.perurans	2	14 dphe	21.4	102.6	1	3	0	2	0	0	34.37
L153	P.perurans	2	14 dphe	21.5	94.6	2	3	0	2	2	1	32.52
L154	P.perurans	7	14 dphe	20.1	79.6	0	2	0	0	0	0	No Ct
L155	P.perurans	7	14 dphe	22.8	123.6	0	2	1	1	0	0	32.99
L156	P.perurans	7	14 dphe	22.8	142.1	1	3	0	1	0	0	29.64
L157	P.perurans	7	14 dphe	20	66.1	0	4	0	3	0	0	No Ct
L158	P.perurans	7	14 dphe	20	78.8	0	2	0	1	0	0	No Ct
L159	Hydroids + P.perurans	3	14 dphe	23.2	132.2	0	2	0	1	0	0	32.07
L160	Hydroids + P.perurans	3	14 dphe	25.7	178.4	0	2	0	2	0	0	28.42
L161	Hydroids + P.perurans	3	14 dphe	23.8	145.6	2	2	2	1	0	0	No Ct
L162	Hydroids + P.perurans	3	14 dphe	19.6	75.4	0	2	0	0	0	0	37.74
L163	Hydroids + P.perurans	3	14 dphe	24	131.4	1	2	0	0	0	0	No Ct
L164	Hydroids + P.perurans	6	14 dphe	23.3	133.8	0	2	0	0	0	0	No Ct
L165	Hydroids + P.perurans	6	14 dphe	24.1	144.4	0	2	0	1	1	1	30.97
L166	Hydroids + P.perurans	6	14 dphe	21.4	106.2	0	2	0	1	0	0	29
L167	Hydroids + P.perurans	6	14 dphe	22.2	123.7	0	2	1	1	0	0	No Ct
L168	Hydroids + P.perurans	6	14 dphe	24.1	134.8	1	2	0	1	0	0	32.36
L169	Control	4	21 dphe	22.8	129	0	0	0	0	0	0	No Ct
L170	Control	4	21 dphe	23.8	156	0	0	0	0	0	0	34.29
L171	Control	4	21 dphe	22.1	113.3	2	0	1	0	0	0	No Ct
L172	Control	4	21 dphe	22.6	119.7	1	0	0	3	0	0	No Ct	24.36	neg	No Ct
L173	Control	4	21 dphe	24.4	131.4	0	0	0	2	0	0	No Ct	29.03	neg	No Ct
L174	Control	8	21 dphe	22	107.5	0	0	0	1	0	0	No Ct
L175	Control	8	21 dphe	24.6	144.2	0	0	0	0	0	0	No Ct
L176	Control	8	21 dphe	20.6	98.6	0	0	0	1	0	0	No Ct
L177	Control	8	21 dphe	22.6	86.6	0	0	0	3	0	0	No Ct	25.79	neg	No Ct
L178	Control	8	21 dphe	24.4	160.1	0	0	0	2	0	0	No Ct	28.46	neg	No Ct
L179	Hydroids	1	21 dphe	23.3	115.4	0	0	1	0	0	0	No Ct
L180	Hydroids	1	21 dphe	20.9	81.1	0	0	0	1	0	0	No Ct
L181	Hydroids	1	21 dphe	22.6	112.3	0	0	0	1	0	0	No Ct
L182	Hydroids	1	21 dphe	23.6	135.2	0	0	0	1	0	0	No Ct	28.66	neg	No Ct
L183	Hydroids	1	21 dphe	21.7	103.2	0	0	0	1	0	0	No Ct	29.72	neg	No Ct
L184	Hydroids	5	21 dphe	21.4	100.4	0	0	0	2	0	0	No Ct
L185	Hydroids	5	21 dphe	25	178.9	0	1	0	1	0	0	No Ct
L186	Hydroids	5	21 dphe	23.4	138	0	0	0	0	0	0	No Ct
L187	Hydroids	5	21 dphe	26.6	216.1	0	0	0	0	0	0	No Ct	30.4	neg	No Ct
L188	Hydroids	5	21 dphe	25.4	171.7	0	0	0	1	0	0	No Ct	28.33	neg	No Ct
L189	P.perurans	2	21 dphe	23.2	137.5	0	2	0	2	0	0	No Ct
L190	P.perurans	2	21 dphe	23.5	135.8	0	2	0	1	0	0	30.4
L191	P.perurans	2	21 dphe	21.8	121.2	0	3	0	2	1	0	32.23
L192	P.perurans	2	21 dphe	22.2	90.5	0	2	0	3	0	0	30.2	26.84	neg	No Ct
L193	P.perurans	2	21 dphe	21.6	101.6	0	3	0	2	2	1	33.53	27.63	neg	No Ct
L194	P.perurans	7	21 dphe	19.3	58.5	3	2	0	2	0	0	No Ct
L195	P.perurans	7	21 dphe	23.6	138.7	0	2	0	2	0	0	34.09
L196	P.perurans	7	21 dphe	22.8	119.2	0	3	0	2	0	0	34.4
L197	P.perurans	7	21 dphe	20.5	92.2	0	3	0	2	1	1	26.32	27.23	neg	21.02
L198	P.perurans	7	21 dphe	23.5	141.1	0	3	0	1	1	0	32.58	28.67	neg	No Ct
L199	Hydroids + P.perurans	3	21 dphe	22.1	127.4	0	2	0	1	0	0	32.98
L200	Hydroids + P.perurans	3	21 dphe	24.1	148.6	0	2	1	0	0	0	33.34
L201	Hydroids + P.perurans	3	21 dphe	27.2	179.3	0	2	2	1	1	1	39.1
L202	Hydroids + P.perurans	3	21 dphe	21.5	103	0	2	0	0	0	0	31.92	30	neg	No Ct
L203	Hydroids + P.perurans	3	21 dphe	19.5	66	0	2	0	3	1	1	26.67	26.24	neg	35.97
L204	Hydroids + P.perurans	6	21 dphe	22	102	0	2	0	2	0	0	32.61
L205	Hydroids + P.perurans	6	21 dphe	18.9	69.5	1	2	0	3	0	0	31.45
L206	Hydroids + P.perurans	6	21 dphe	22	116.5	0	2	0	1	0	0	No Ct
L207	Hydroids + P.perurans	6	21 dphe	23	138	0	3	1	2	0	0	27.37	29.17	neg	No Ct
L208	Hydroids + P.perurans	6	21 dphe	22	100	0	3	0	1	0	0	33.91	29.12	neg	No Ct
L209	Control	4	28 dphe	23.2	130.7	0	0	0	2	0	0	No Ct
L210	Control	4	28 dphe	26.5	181.5	0	0	0	2	0	0	No Ct
L211	Control	4	28 dphe	22.7	102.4	0	0	0	1	0	0	No Ct
L212	Control	4	28 dphe	21.9	101.3	1	0	0	2	0	0	No Ct
L213	Control	4	28 dphe	27.5	183.9	0	0	1	1	0	0	No Ct
L214	Control	8	28 dphe	21.1	104.3	0	0	0	1	0	0	No Ct
L215	Control	8	28 dphe	25	160.5	0	0	0	0	0	0	No Ct
L216	Control	8	28 dphe	22.6	122.6	0	0	0	1	0	0	No Ct
L217	Control	8	28 dphe	24.8	170.6	0	0	0	0	0	0	No Ct
L218	Control	8	28 dphe	22.1	114.7	0	0	0	0	0	0	No Ct
L219	Hydroids	1	28 dphe	20.6	87.5	0	0	0	0	0	0	No Ct
L220	Hydroids	1	28 dphe	20.8	92.7	0	0	0	2	0	0	No Ct
L221	Hydroids	1	28 dphe	22.1	107.6	1	0	0	2	0	0	No Ct
L222	Hydroids	1	28 dphe	24.3	147.7	0	0	0	0	0	0	33.85
L223	Hydroids	1	28 dphe	22.3	110.6	0	0	0	1	0	0	No Ct
L224	Hydroids	5	28 dphe	21.9	117	0	0	0	0	0	0	34.39
L225	Hydroids	5	28 dphe	22.1	123.3	0	1	1	1	0	0	No Ct
L226	Hydroids	5	28 dphe	23.9	142.9	0	0	0	2	0	0	35.36
L227	Hydroids	5	28 dphe	24	158.9	0	0	2	0	0	0	No Ct
L228	Hydroids	5	28 dphe	20.9	79	1	0	0	2	0	0	No Ct
L229	P.perurans	2	28 dphe	24.1	143.9	0	3	0	2	2	0	33.98
L230	P.perurans	2	28 dphe	23.2	123.4	0	3	0	2	1	1	28.04
L231	P.perurans	2	28 dphe	23.4	128.2	0	3	0	2	2	1	28.08
L232	P.perurans	2	28 dphe	24.7	153.1	0	2	0	2	2	1	28.59
L233	P.perurans	2	28 dphe	21.8	106.4	0	2	0	1	1	1	24.46
L234	P.perurans	7	28 dphe	23.2	116.8	0	2	0	1	1	1	28.75
L235	P.perurans	7	28 dphe	20	90.2	0	2	1	1	1	1	35.9
L236	P.perurans	7	28 dphe	23.5	138.4	0	3	0	3	2	1	28.96
L237	P.perurans	7	28 dphe	21.3	107.1	0	3	0	2	2	1	26.82
L238	P.perurans	7	28 dphe	22.5	124.6	0	3	0	2	2	1	28.61
L239	Hydroids + P.perurans	3	28 dphe	19.7	56.7	1	2	0	2	2	1	26.32
L240	Hydroids + P.perurans	3	28 dphe	21.2	93.8	1	2	0	2	2	1	28.27
L241	Hydroids + P.perurans	3	28 dphe	24.3	149.6	0	4	0	2	1	1	25.78
L242	Hydroids + P.perurans	3	28 dphe	23.2	109.5	0	2	0	1	1	1	33.72
L243	Hydroids + P.perurans	3	28 dphe	21.4	110.1	2	2	0	2	2	1	30.9
L244	Hydroids + P.perurans	6	28 dphe	24.2	148.9	0	2	0	1	1	0	31.43
L245	Hydroids + P.perurans	6	28 dphe	24.6	153.5	0	2	0	1	0	0	30.67
L246	Hydroids + P.perurans	6	28 dphe	21	78.4	0	2	0	2	1	1	29.25
L247	Hydroids + P.perurans	6	28 dphe	24	140.6	0	2	0	2	2	1	38.22
L248	Hydroids + P.perurans	6	28 dphe	22.9	113.5	0	2	1	2	1	0	29.28
L249	Control	4	35 dphe	26	176	0	0	0	1	0	0	No Ct
L250	Control	4	35 dphe	23.3	134	0	0	0	0	0	0	No Ct
L251	Control	4	35 dphe	22.6	106	0	0	1	1	0	0	No Ct
L252	Control	4	35 dphe	23.7	140	0	0	0	1	0	0	No Ct	28.61	neg	29.99
L253	Control	4	35 dphe	24.3	148	0	0	0	0	0	0	No Ct	28.74	neg	No Ct
L254	Control	8	35 dphe	23.2	128	1	0	0	0	0	0	No Ct
L255	Control	8	35 dphe	23.9	140	0	0	0	2	0	0	No Ct
L256	Control	8	35 dphe	23	138	0	0	0	1	0	0	No Ct
L257	Control	8	35 dphe	25	192	0	0	0	0	0	0	No Ct	34.47	neg	29.71
L258	Control	8	35 dphe	25.3	184	0	0	0	0	0	0	No Ct	38.8	neg	31.53
L259	Hydroids	1	35 dphe	24.2	152	0	2	0	1	0	0	No Ct
L260	Hydroids	1	35 dphe	25.5	178	1	0	0	0	0	0	37.96
L261	Hydroids	1	35 dphe	25.8	180	0	1	0	1	0	0	No Ct
L262	Hydroids	1	35 dphe	21.7	106	1	0	0	0	0	0	No Ct	34.83	neg	37.2
L263	Hydroids	1	35 dphe	23.3	113	0	1	0	3	0	0	No Ct	27.44	neg	36.3
L264	Hydroids	5	35 dphe	23.2	142	1	1	0	1	0	0	No Ct
L265	Hydroids	5	35 dphe	24.3	150	0	1	0	0	0	0	No Ct
L266	Hydroids	5	35 dphe	24.5	152	0	1	0	1	0	0	No Ct
L267	Hydroids	5	35 dphe	22.1	88	0	1	0	1	0	0	No Ct	30.33	neg	35.12
L268	Hydroids	5	35 dphe	24.6	168	0	1	0	1	0	0	No Ct	32.47	neg	35.74
L269	P.perurans	2	35 dphe	21.6	96	0	4	0	2	2	1	29.53
L270	P.perurans	2	35 dphe	24.6	152	0	4	1	2	2	1	29.95
L271	P.perurans	2	35 dphe	22.7	92	0	3	0	2	2	1	34.49
L272	P.perurans	2	35 dphe	22.8	126	0	4	0	2	2	1	26.42	31.81	neg	29.08
L273	P.perurans	2	35 dphe	24.2	152	0	4	0	2	2	1	28.78	36.26	neg	No Ct
L274	P.perurans	7	35 dphe	24.4	150	0	5	0	3	3	1	29.41
L275	P.perurans	7	35 dphe	26.9	190	0	3	0	3	2	1	31.81
L276	P.perurans	7	35 dphe	24	148	0	3	0	2	1	1	30.54
L277	P.perurans	7	35 dphe	21.5	98	0	3	0	3	2	1	29.51	26.36	neg	No Ct
L278	P.perurans	7	35 dphe	25.3	176	0	4	0	2	2	1	28.81	33.18	neg	33.54
L279	Hydroids + P.perurans	3	35 dphe	26.5	182	0	4	0	3	3	1	27.5
L280	Hydroids + P.perurans	3	35 dphe	22	92	0	5	0	2	2	1	no value
L281	Hydroids + P.perurans	3	35 dphe	24.7	144	0	5	0	2	2	1	26.42
L282	Hydroids + P.perurans	3	35 dphe	24.1	148	0	4	0	3	3	1	26.77	29.22	neg	No Ct
L283	Hydroids + P.perurans	3	35 dphe	21.3	102	0	4	0	3	2	1	27.98	29.82	neg	29.27
L284	Hydroids + P.perurans	6	35 dphe	22.4	106	0	4	1	2	2	0	30.51
L285	Hydroids + P.perurans	6	35 dphe	22.2	120	0	3	0	3	2	0	31.9
L286	Hydroids + P.perurans	6	35 dphe	24.8	162	0	3	0	2	2	1	31.41
L287	Hydroids + P.perurans	6	35 dphe	23	132	0	4	0	2	2	1	29.93	29.76	neg	29.82
L288	Hydroids + P.perurans	6	35 dphe	25.3	182	0	4	0	2	2	1	26.53	24.95	neg	No Ct
